# Supplementary material for: Innovative Collagen Based Biopolymers Tested as Fertilizers for Poor Soils Amendment
Source: MDPI journal article supplement (doi:10.3390/polym15092085), 2023-04-27
Supplement: s1 [file s1]

**Table S1.** Absolute locations of sampling points for Greek and Romanian soils

| Geographical Location  | Country | Code | GPS Coordinates |           |
|------------------------|---------|------|-----------------|-----------|
|                        |         |      | North           | East      |
| Neochori Messolonghiou | Greece  | S1   | 38°24'39"       | 21°16'29" |
| Kernitsa Achaïas       | Greece  | S2   | 38°07'24"       | 22°10'53" |
| University of Patras   | Greece  | S3   | 38°17'24"       | 21°47'13" |
| Aldeni, Buzau County   | Romania | S4   | 45°19'08"       | 26°45'24" |

**Table S2.** Soil texture

| Soil sample | Particle size (mm) distribution (%) |      |       |         |           |         |          |           |      |       |      | Textural class |
|-------------|-------------------------------------|------|-------|---------|-----------|---------|----------|-----------|------|-------|------|----------------|
|             | Coarse sand                         |      |       |         | Fine sand |         |          |           | Silt | Clay  |      | Symbol         |
|             | 2-0.2                               | 2-1  | 1-0.5 | 0.5-0.2 | 0.2-0.02  | 0.2-0.1 | 0.1-0.05 | 0.05-0.02 | 0.02 | 0.002 | 0.01 |                |
| S1          | 28.1                                | 10.5 | 6.6   | 11.0    | 29.3      | 6.7     | 2.5      | 20.1      | 19.6 | 23.0  | 36.8 | L              |
| S2          | 14.4                                | 4.1  | 4.0   | 6.3     | 22.1      | 5.5     | 2.7      | 13.9      | 19.5 | 44.0  | 57.9 | CL             |
| S3          | 6.4                                 | 1.4  | 1.1   | 3.9     | 7.1       | 3.0     | 1.6      | 2.5       | 46.8 | 39.7  | 57.7 | SiCL           |
| S4          | 35.1                                | 12.5 | 4.9   | 14.7    | 36.7      | 25.5    | 10.3     | 0.9       | 1.2  | 27.0  | 36.0 | SCL            |
